# Supplementary material for: Efficient urea formation from N2O + CO on dual-atom catalysts TM2/g-CN
Source: Royal Society of Chemistry journal article supplement (doi:10.1039/d3ta00896g), 2023-01-01
Supplement: d3ta00896g1.pdf [file d3ta00896g1.pdf]

**Efficient Urea Formation from  $\text{N}_2\text{O}+\text{CO}$  on Dual-Atom Catalysts  $\text{TM}_2/\text{g-CN}$**

Zebin Ren, Xinxin Wang, Shuhua Wang, Haona Zhang, Baibiao Huang, Ying Dai\*

and Wei Wei\*

*School of Physics, State Key Laboratory of Crystal Materials, Shandong University,*

*Jinan 250100, China*

\* Corresponding authors: [daiy60@sdu.edu.cn](mailto:daiy60@sdu.edu.cn) (Y. Dai), [weiw@sdu.edu.cn](mailto:weiw@sdu.edu.cn) (W. Wei)

**Table S1** Elementary reactions for the considered pathways for  $\text{N}_2\text{O} \rightarrow \text{NH}_3$  process.

| Enzymatic                                                                                               | Consecutive                                                                                       |
|---------------------------------------------------------------------------------------------------------|---------------------------------------------------------------------------------------------------|
| $\text{N}_2\text{O} (\text{g}) + * \rightarrow * \text{N}_2\text{O}$                                    | $\text{N}_2\text{O} (\text{g}) + * \rightarrow * \text{N}_2\text{O}$                              |
| $* \text{N}_2\text{O} + \text{H}^+ + \text{e}^- \rightarrow * \text{NNOH}$                              | $* \text{N}_2\text{O} + \text{H}^+ + \text{e}^- \rightarrow * \text{NNOH}$                        |
| $* \text{NNOH} + \text{H}^+ + \text{e}^- \rightarrow * \text{NN} + \text{H}_2\text{O} (\text{g})$       | $* \text{NNOH} + \text{H}^+ + \text{e}^- \rightarrow * \text{NN} + \text{H}_2\text{O} (\text{g})$ |
| $* \text{NN} + \text{H}^+ + \text{e}^- \rightarrow * \text{NNH}$                                        | $* \text{NN} + \text{H}^+ + \text{e}^- \rightarrow * \text{NNH}$                                  |
| $* \text{NNH} + \text{H}^+ + \text{e}^- \rightarrow * \text{NHNH}$                                      | $* \text{NNH} + \text{H}^+ + \text{e}^- \rightarrow * \text{NNH}_2$                               |
| $* \text{NHNH} + \text{H}^+ + \text{e}^- \rightarrow * \text{NHNH}_2$                                   | $* \text{NNH}_2 + \text{H}^+ + \text{e}^- \rightarrow * \text{N} + \text{NH}_3 (\text{g})$        |
| $* \text{NHNH}_2 + \text{H}^+ + \text{e}^- \rightarrow * \text{NH}_2\text{NH}_2$                        | $* \text{N} + \text{H}^+ + \text{e}^- \rightarrow * \text{NH}$                                    |
| $* \text{NH}_2\text{NH}_2 + \text{H}^+ + \text{e}^- \rightarrow * \text{NH}_2 + \text{NH}_3 (\text{g})$ | $* \text{NH} + \text{H}^+ + \text{e}^- \rightarrow * \text{NH}_2$                                 |
| $* \text{NH}_2 + \text{H}^+ + \text{e}^- \rightarrow * \text{NH}_3$                                     | $* \text{NH}_2 + \text{H}^+ + \text{e}^- \rightarrow * \text{NH}_3$                               |
| $* \text{NH}_3 \rightarrow * + \text{NH}_3 (\text{g})$                                                  | $* \text{NH}_3 \rightarrow * + \text{NH}_3 (\text{g})$                                            |
| Mixed 1                                                                                                 | Mixed 2                                                                                           |
| $\text{N}_2\text{O} (\text{g}) + * \rightarrow * \text{N}_2\text{O}$                                    | $\text{N}_2\text{O} (\text{g}) + * \rightarrow * \text{N}_2\text{O}$                              |
| $* \text{N}_2\text{O} + \text{H}^+ + \text{e}^- \rightarrow * \text{NNOH}$                              | $* \text{N}_2\text{O} + \text{H}^+ + \text{e}^- \rightarrow * \text{NNOH}$                        |
| $* \text{NNOH} + \text{H}^+ + \text{e}^- \rightarrow * \text{NN} + \text{H}_2\text{O} (\text{g})$       | $* \text{NNOH} + \text{H}^+ + \text{e}^- \rightarrow * \text{NN} + \text{H}_2\text{O} (\text{g})$ |
| $* \text{NN} + \text{H}^+ + \text{e}^- \rightarrow * \text{NNH}$                                        | $* \text{NN} + \text{H}^+ + \text{e}^- \rightarrow * \text{NNH}$                                  |
| $* \text{NNH} + \text{H}^+ + \text{e}^- \rightarrow * \text{NNH}_2$                                     | $* \text{NNH} + \text{H}^+ + \text{e}^- \rightarrow * \text{NHNH}$                                |
| $* \text{NNH}_2 + \text{H}^+ + \text{e}^- \rightarrow * \text{NHNH}_2$                                  | $* \text{NHNH} + \text{H}^+ + \text{e}^- \rightarrow * \text{NHNH}_2$                             |
| $* \text{NHNH}_2 + \text{H}^+ + \text{e}^- \rightarrow * \text{NH}_2\text{NH}_2$                        | $* \text{NHNH}_2 + \text{H}^+ + \text{e}^- \rightarrow * \text{NH} + \text{NH}_3 (\text{g})$      |
| $* \text{NH}_2\text{NH}_2 + \text{H}^+ + \text{e}^- \rightarrow * \text{NH}_2 + \text{NH}_3 (\text{g})$ | $* \text{NH} + \text{H}^+ + \text{e}^- \rightarrow * \text{NH}_2$                                 |
| $* \text{NH}_2 + \text{H}^+ + \text{e}^- \rightarrow * \text{NH}_3$                                     | $* \text{NH}_2 + \text{H}^+ + \text{e}^- \rightarrow * \text{NH}_3$                               |
| $* \text{NH}_3 \rightarrow * + \text{NH}_3 (\text{g})$                                                  | $* \text{NH}_3 \rightarrow * + \text{NH}_3 (\text{g})$                                            |

**Table S2** Calculated binding energy ( $E_b$ ) of transition metal (TM) atoms on  $g$ -CN and cohesive energy ( $E_{\text{coh}}$ ) of TM atoms.  $E_b$  is calculated by  $E_b = (E_{\text{DACs}} - E_{g\text{-CN}} - 2E_M)/2$ , where  $E_{\text{DACs}}$ ,  $E_{g\text{-CN}}$  and  $E_M$  are the energies of DACs, pure  $g$ -CN and metal atoms, respectively.  $E_{\text{coh}}$  is looked up in the KnowledgeDoor database.

| $\text{TM}_2/g\text{-CN}$ | $E_b$ (eV) | $E_{\text{coh}}$ (eV) | $\text{TM}_2/g\text{-CN}$ | $E_b$ (eV) | $E_{\text{coh}}$ (eV) |
|---------------------------|------------|-----------------------|---------------------------|------------|-----------------------|
| $\text{Ti}_2/g\text{-CN}$ | -6.34      | -4.85                 | $\text{Rh}_2/g\text{-CN}$ | -5.39      | -5.75                 |
| $\text{V}_2/g\text{-CN}$  | -6.08      | -5.31                 | $\text{Pd}_2/g\text{-CN}$ | -3.41      | -3.89                 |
| $\text{Cr}_2/g\text{-CN}$ | -4.21      | -4.1                  | $\text{Ag}_2/g\text{-CN}$ | -1.75      | -2.95                 |
| $\text{Mn}_2/g\text{-CN}$ | -3.49      | -2.92                 | $\text{Cd}_2/g\text{-CN}$ | -0.79      | -1.16                 |
| $\text{Fe}_2/g\text{-CN}$ | -4.41      | -4.28                 | $\text{Hf}_2/g\text{-CN}$ | -6.26      | -6.44                 |
| $\text{Co}_2/g\text{-CN}$ | -4.62      | -4.39                 | $\text{Ta}_2/g\text{-CN}$ | -8.12      | -8.10                 |
| $\text{Ni}_2/g\text{-CN}$ | -4.92      | -4.44                 | $\text{W}_2/g\text{-CN}$  | -9.01      | -8.90                 |
| $\text{Cu}_2/g\text{-CN}$ | -2.99      | -3.49                 | $\text{Re}_2/g\text{-CN}$ | -9.07      | -8.03                 |
| $\text{Zn}_2/g\text{-CN}$ | -1.46      | -1.35                 | $\text{Os}_2/g\text{-CN}$ | -6.88      | -8.17                 |
| $\text{Zr}_2/g\text{-CN}$ | -6.22      | -6.25                 | $\text{Ir}_2/g\text{-CN}$ | -6.39      | -6.94                 |

|                       |       |       |                       |       |       |
|-----------------------|-------|-------|-----------------------|-------|-------|
| Nb <sub>2</sub> /g-CN | -6.86 | -7.57 | Pt <sub>2</sub> /g-CN | -5.36 | -5.84 |
| Mo <sub>2</sub> /g-CN | -6.18 | -6.82 | Au <sub>2</sub> /g-CN | -1.80 | -3.81 |
| Ru <sub>2</sub> /g-CN | -6.91 | -6.74 |                       |       |       |

**Table S3** Free energy change of adsorbed NCON ( $\Delta G^*_{\text{NCON}}$ ) on TM<sub>2</sub>/g-CN and transferred charge from TM<sub>2</sub>/g-CN to adsorbed NCON.

| TM <sub>2</sub> /g-CN | $\Delta G^*_{\text{NCON}}$ (eV) | Charge ( $e^-$ ) |
|-----------------------|---------------------------------|------------------|
| Ti <sub>2</sub> /g-CN | -4.04                           | 1.64             |
| Cr <sub>2</sub> /g-CN | -2.29                           | 1.23             |
| Mn <sub>2</sub> /g-CN | -2.64                           | 1.18             |
| Fe <sub>2</sub> /g-CN | -2.02                           | 1.10             |
| Co <sub>2</sub> /g-CN | -1.99                           | 1.20             |
| W <sub>2</sub> /g-CN  | -4.96                           | 1.41             |
| Re <sub>2</sub> /g-CN | -3.87                           | 1.27             |

**Table S4** Free energy change of adsorbed NCOHN ( $\Delta G^*_{\text{NCOHN}}$ ) and NCONH ( $\Delta G^*_{\text{NCONH}}$ ) on TM<sub>2</sub>/g-CN. The unit is eV.

| TM <sub>2</sub> /g-CN | $\Delta G^*_{\text{NCOHN}}$ | $\Delta G^*_{\text{NCONH}}$ |
|-----------------------|-----------------------------|-----------------------------|
| Ti <sub>2</sub> /g-CN | -4.27                       | -4.95                       |
| Cr <sub>2</sub> /g-CN | -3.00                       | -3.32                       |
| Mn <sub>2</sub> /g-CN | -3.30                       | -3.59                       |
| Fe <sub>2</sub> /g-CN | -3.26                       | -3.73                       |
| Co <sub>2</sub> /g-CN | -2.61                       | -3.10                       |
| W <sub>2</sub> /g-CN  | -5.28                       | -5.68                       |
| Re <sub>2</sub> /g-CN | -4.30                       | -4.75                       |

**Table S5** Free energy change of six protonation steps in the urea synthesis process by distal/alternative pathway on  $\text{TM}_2/\text{g-CN}$ . The unit is eV.

| $\text{TM}_2/\text{g-CN}$ | $\Delta G_1$ | $\Delta G_2$ | $\Delta G_3$ | $\Delta G_4$ | $\Delta G_5$ | $\Delta G_6$ |
|---------------------------|--------------|--------------|--------------|--------------|--------------|--------------|
| $\text{Ti}_2/\text{g-CN}$ | -1.94        | 0.41         | -0.91        | 0.14/0.38    | -0.18/-0.41  | -0.20        |
| $\text{Cr}_2/\text{g-CN}$ | -0.54        | -1.61        | -1.03        | -0.70/-1.23  | -0.74-0.21   | 0.19         |
| $\text{Mn}_2/\text{g-CN}$ | -0.36        | -1.86        | -0.95        | -0.28-0.97   | -1.35/-0.66  | 0.28         |
| $\text{Fe}_2/\text{g-CN}$ | -1.92        | -0.19        | -1.71        | -0.84/-0.64  | -0.45/-0.65  | -0.20        |
| $\text{Co}_2/\text{g-CN}$ | 0.15         | -2.40        | -1.11        | -0.05/-0.73  | -1.44/-0.77  | -0.40        |
| $\text{W}_2/\text{g-CN}$  | -0.15        | -1.54        | -0.72        | -0.33-0.80   | -0.28/0.19   | 0.87         |
| $\text{Re}_2/\text{g-CN}$ | -0.13        | -1.23        | -0.88        | 0.01/-0.63   | -0.58/0.05   | 0.48         |

**Table S6** Free energy change of adsorbed NCON ( $\Delta G_{\text{NCON}}^*$ ) and the limiting potential ( $U_L$ ) of urea synthesis on  $\text{TM}_2/\text{g-CN}$ .

| $\text{TM}_2/\text{g-CN}$ | $\Delta G_{\text{NCON}}^*$ (eV) | $U_L$ (V) |
|---------------------------|---------------------------------|-----------|
| $\text{Ti}_2/\text{g-CN}$ | -4.04                           | -0.41     |
| $\text{Cr}_2/\text{g-CN}$ | -2.29                           | -0.19     |
| $\text{Mn}_2/\text{g-CN}$ | -2.64                           | -0.28     |
| $\text{Fe}_2/\text{g-CN}$ | -2.02                           | /         |
| $\text{Co}_2/\text{g-CN}$ | -1.99                           | -0.15     |
| $\text{W}_2/\text{g-CN}$  | -4.96                           | -0.87     |
| $\text{Re}_2/\text{g-CN}$ | -3.87                           | -0.48     |

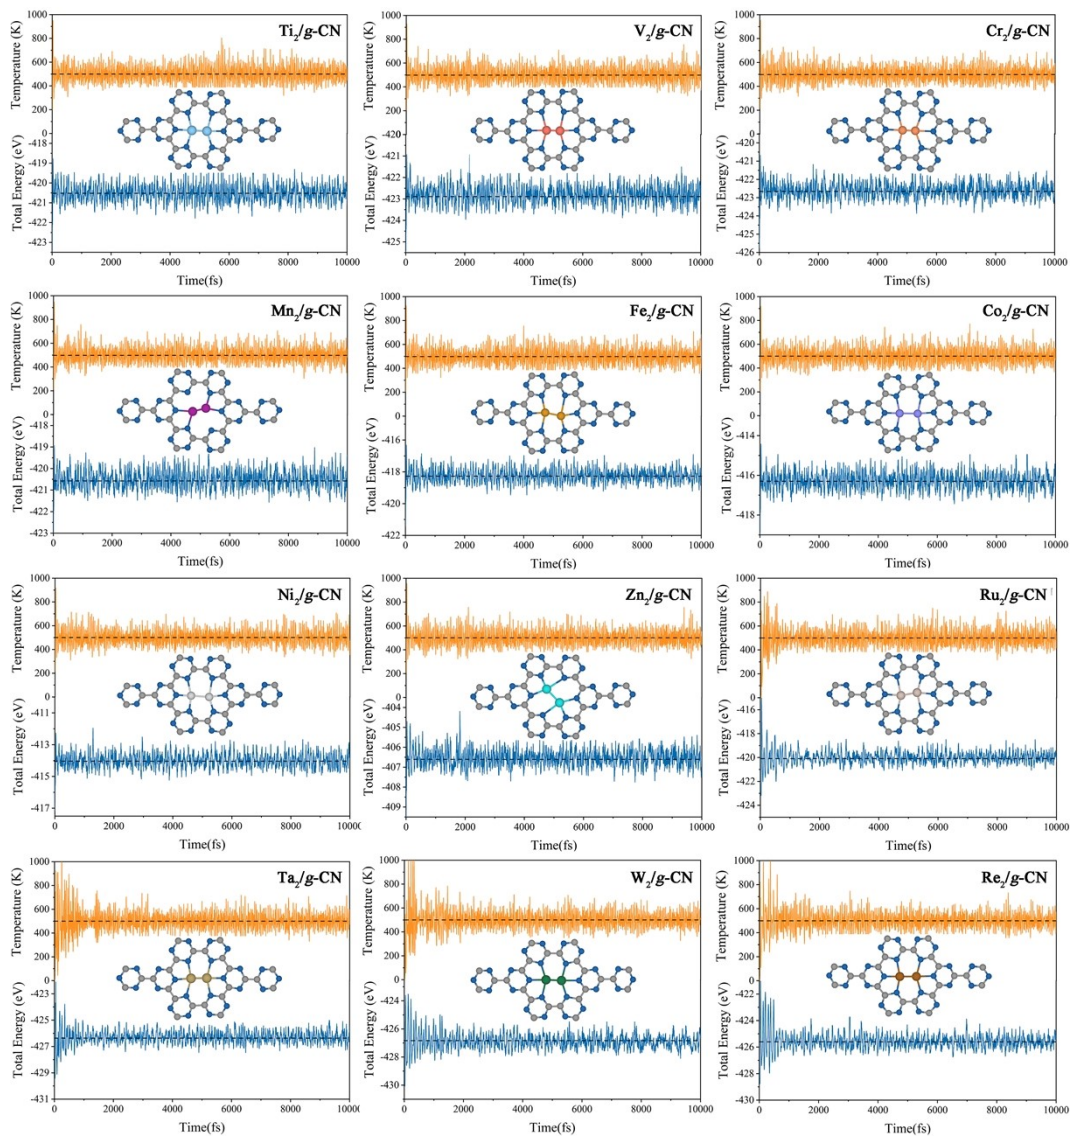

**Fig. S1** Variations of temperature and energy against time from AIMD simulations for  $TM_2/g-CN$ . Insets are structure snapshots of  $TM_2/g-CN$  at 500 K after 10 ps AIMD simulations.

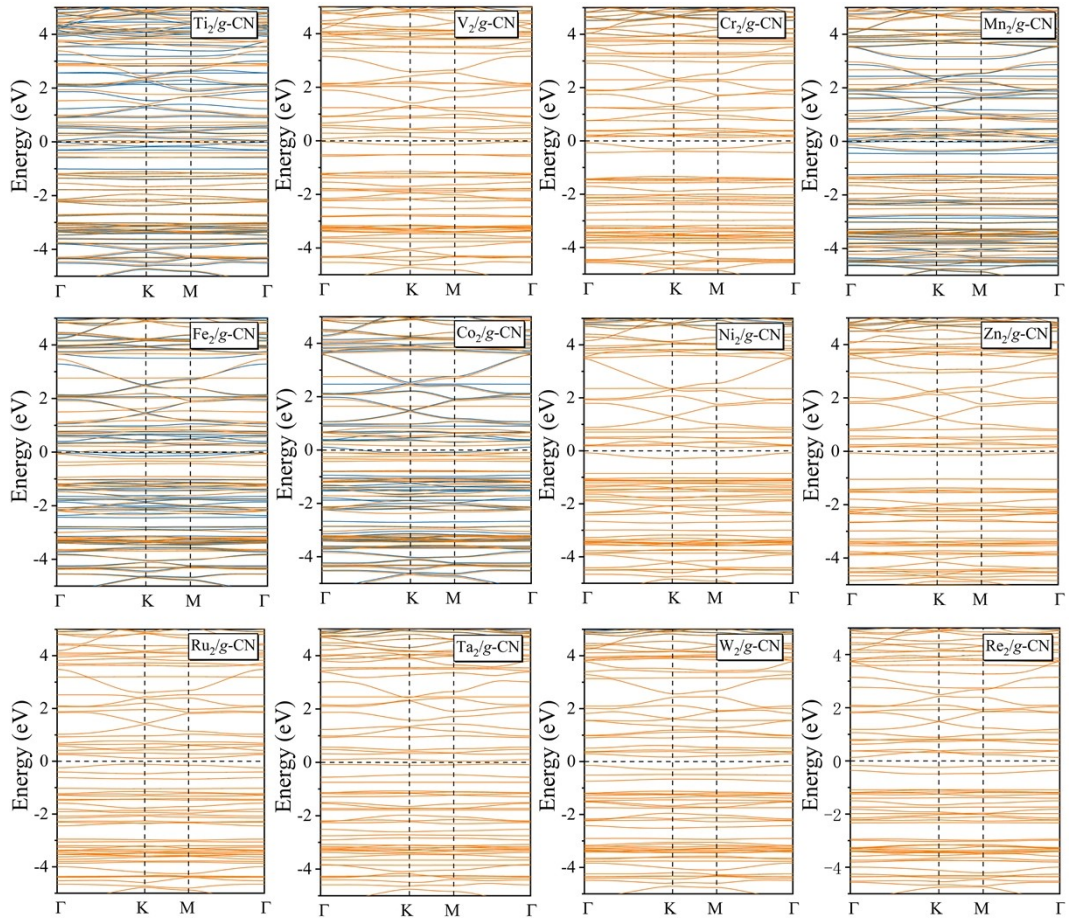

**Fig. S2** Band structures of TM<sub>2</sub>/g-CN. The Fermi level is set to zero.



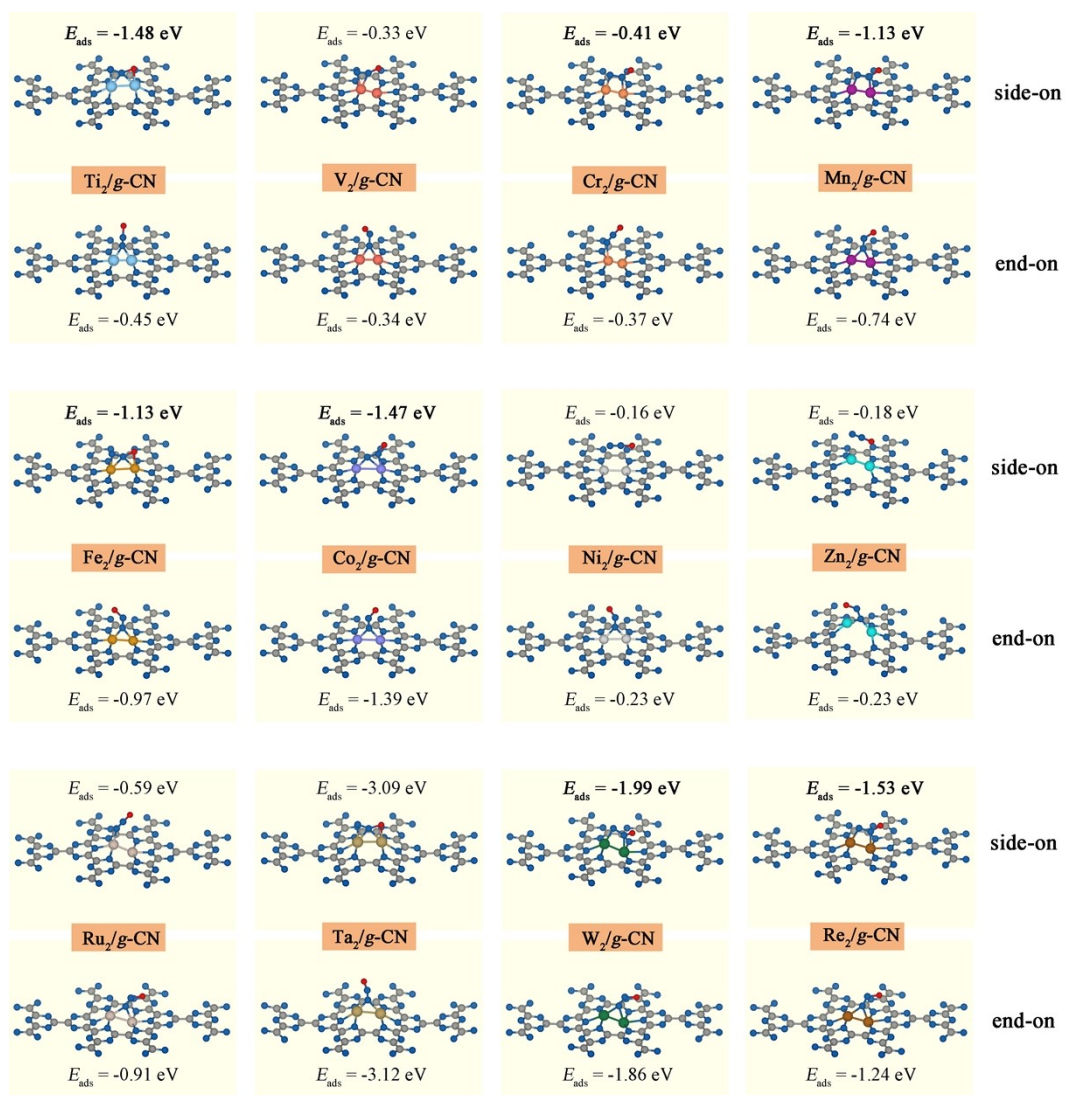

**Fig. S3** Adsorption configuration of  $\text{N}_2\text{O}$  on dual-TM atom active centers.  $\text{N}_2\text{O}$  adsorption energy ( $E_{\text{ads}}$ ) is marked.

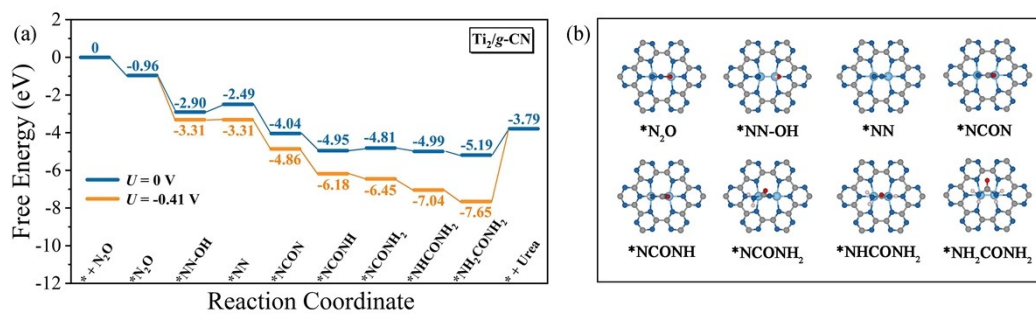

**Fig. S4** (a) Gibbs free energy diagram for the urea synthesis on  $\text{Ti}_2/\text{g-CN}$  at zero (blue line) and applied potential (orange line) through distal mechanism. (b) Corresponding adsorption configurations of reaction intermediates.

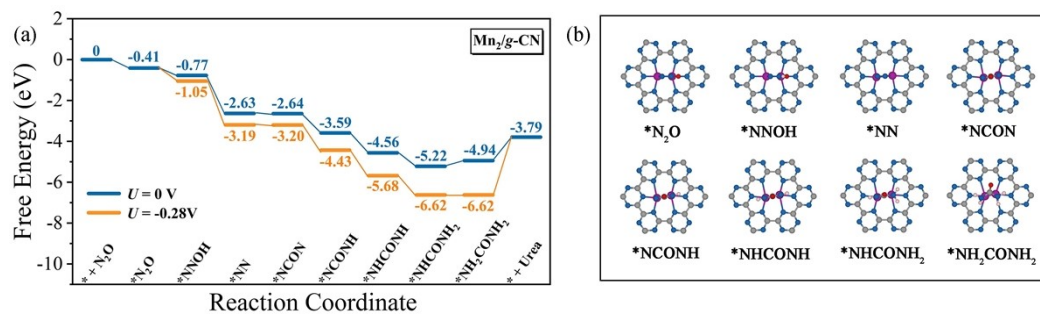

**Fig. S5** (a) Gibbs free energy diagram for the urea synthesis on Mn<sub>2</sub>/g-CN at zero (blue line) and applied potential (orange line) through alternative mechanism. (b) Corresponding adsorption configurations of reaction intermediates.

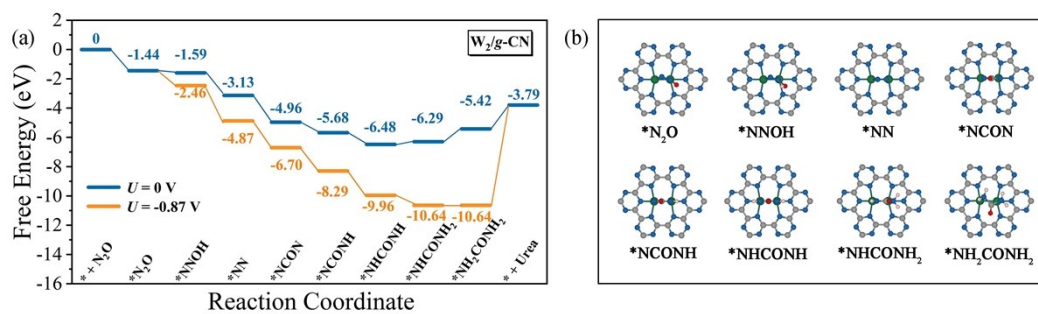

**Fig. S6** (a) Gibbs free energy diagram for the urea synthesis on  $W_2/g\text{-CN}$  at zero (blue line) and applied potential (orange line) through alternative mechanism. (b) Corresponding adsorption configurations of reaction intermediates.

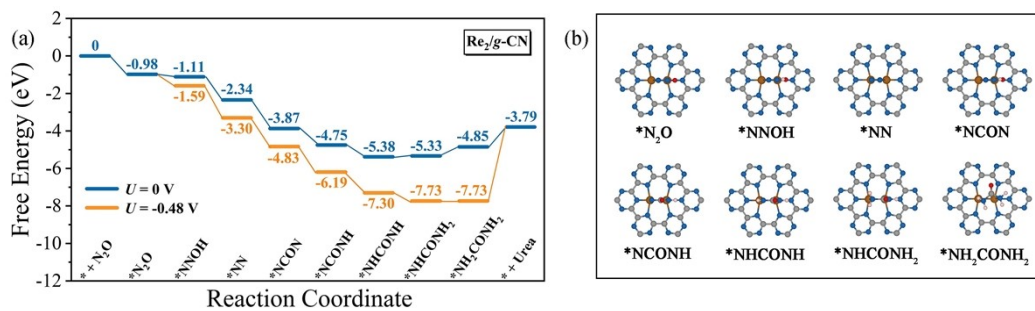

**Fig. S7** (a) Gibbs free energy diagram for the urea synthesis on  $\text{Re}_2/\text{g-CN}$  at zero (blue line) and applied potential (orange line) through alternative mechanism. (b) Corresponding adsorption configurations of reaction intermediates.

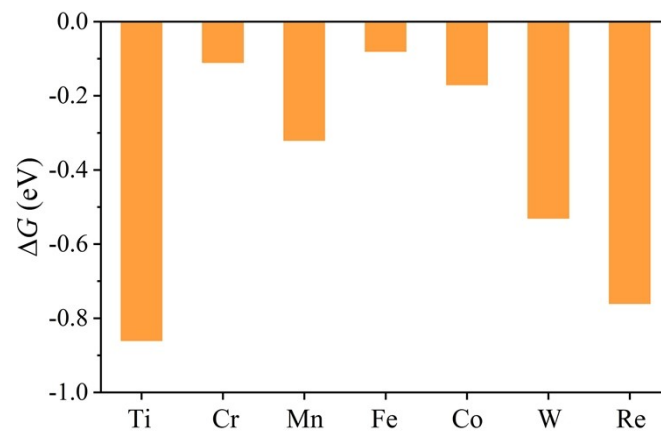

**Fig. S8** Gibbs free energy difference between  $N_2O$  and H adsorption ( $\Delta G = \Delta G_{*N_2O} - \Delta G_{*H}$ ) on  $TM_2/g-CN$ .
